# Supplementary material
Source: PubMed Central journal article supplement (PMC4418192)
Supplement: NIHMS682109-supplement-Supplement.pdf [file NIHMS682109-supplement-Supplement.pdf]

| <i>Parameters</i> |                |        | <i>Performance</i> |                |         |
|-------------------|----------------|--------|--------------------|----------------|---------|
| Targets           | Hold time (ms) | Trials | Success rate       | <b>Bitrate</b> | Std dev |
| 09                | 250            | 0396   | 0.58               | <b>0.77</b>    | 1.49    |
| 09                | 450            | 0520   | 0.96               | <b>2.85</b>    | 0.68    |
| 09                | 650            | 0364   | 1.00               | <b>2.56</b>    | 0.17    |
| 09                | 850            | 0377   | 0.99               | <b>2.10</b>    | 0.27    |
| 25                | 250            | 1170   | 0.71               | <b>2.10</b>    | 1.83    |
| 25                | 450            | 1066   | 0.96               | <b>3.42*</b>   | 0.73    |
| 25                | 650            | 1032   | 0.98               | <b>2.82</b>    | 0.45    |
| 25                | 850            | 1066   | 0.98               | <b>2.40</b>    | 0.45    |
| 49                | 250            | 1994   | 0.77               | <b>2.97</b>    | 1.59    |
| 49                | 450            | 1998   | 0.92               | <b>3.21</b>    | 0.88    |
| 49                | 650            | 1926   | 0.90               | <b>2.28</b>    | 0.83    |
| 49                | 850            | 1654   | 0.87               | <b>1.68</b>    | 0.70    |
| 64                | 250            | 2417   | 0.67               | <b>1.84</b>    | 1.84    |
| 64                | 450            | 2340   | 0.86               | <b>2.64</b>    | 1.05    |
| 64                | 650            | 1495   | 0.90               | <b>2.03</b>    | 0.72    |
| 64                | 850            | 0901   | 0.68               | <b>1.23</b>    | 0.75    |

Supplementary Table 1: Grid Task - Monkey J

| <i>Parameters</i> |                |        | <i>Performance</i> |                |         |
|-------------------|----------------|--------|--------------------|----------------|---------|
| Targets           | Hold time (ms) | Trials | Success rate       | <b>Bitrate</b> | Std dev |
| 09                | 250            | 0325   | 0.39               | <b>0.00</b>    | 1.74    |
| 09                | 450            | 0367   | 0.86               | <b>2.14</b>    | 0.82    |
| 09                | 650            | 0373   | 0.98               | <b>2.27</b>    | 0.37    |
| 09                | 850            | 0374   | 1.00               | <b>2.11</b>    | 0.15    |
| 25                | 250            | 0853   | 0.47               | <b>0.00</b>    | 2.18    |
| 25                | 450            | 1156   | 0.92               | <b>3.00*</b>   | 0.79    |
| 25                | 650            | 1004   | 0.96               | <b>2.51</b>    | 0.56    |
| 25                | 850            | 1013   | 0.93               | <b>1.92</b>    | 0.51    |
| 49                | 250            | 1087   | 0.51               | <b>0.10</b>    | 2.05    |
| 49                | 450            | 2048   | 0.88               | <b>2.63</b>    | 0.98    |
| 49                | 650            | 1830   | 0.92               | <b>2.19</b>    | 0.68    |
| 49                | 850            | 1134   | 0.78               | <b>1.38</b>    | 0.61    |
| 64                | 250            | 1547   | 0.57               | <b>0.74</b>    | 2.14    |
| 64                | 450            | 1973   | 0.79               | <b>1.83</b>    | 0.93    |
| 64                | 650            | 1614   | 0.80               | <b>1.57</b>    | 0.73    |
| 64                | 850            | 0979   | 0.55               | <b>0.80</b>    | 0.50    |

Supplementary Table 2: Grid Task - Monkey L

| <i>Parameters</i> |               |        | <i>Performance</i> |                |         |
|-------------------|---------------|--------|--------------------|----------------|---------|
| Targets           | Distance (cm) | Trials | Success rate       | <b>Bitrate</b> | Std dev |
| 02                | 05            | 0158   | 0.93               | <b>1.40</b>    | 0.31    |
| 02                | 07            | 0306   | 0.96               | <b>1.14</b>    | 0.21    |
| 02                | 09            | 0219   | 0.96               | <b>1.17</b>    | 0.22    |
| 02                | 11            | 0156   | 0.99               | <b>1.15</b>    | 0.12    |
| 02                | 13            | 0051   | 1.00               | <b>1.06</b>    | 0.14    |
| 04                | 05            | 0418   | 0.89               | <b>2.43</b>    | 0.70    |
| 04                | 07            | 0309   | 0.94               | <b>2.57</b>    | 0.53    |
| 04                | 09            | 0303   | 1.00               | <b>2.42</b>    | 0.16    |
| 04                | 11            | 0412   | 0.99               | <b>2.22</b>    | 0.19    |
| 04                | 13            | 0303   | 0.94               | <b>1.60</b>    | 0.46    |
| 08                | 05            | 0706   | 0.72               | <b>1.99</b>    | 1.50    |
| 08                | 07            | 0808   | 0.84               | <b>2.60</b>    | 1.03    |
| 08                | 09            | 0831   | 0.93               | <b>3.06*</b>   | 0.70    |
| 08                | 11            | 0807   | 0.90               | <b>2.61</b>    | 0.97    |
| 08                | 13            | 0403   | 0.90               | <b>2.38</b>    | 0.75    |
| 12                | 05            | 0601   | 0.47               | <b>0.00</b>    | 1.77    |
| 12                | 07            | 1611   | 0.74               | <b>2.20</b>    | 1.41    |
| 12                | 09            | 0907   | 0.84               | <b>2.88</b>    | 1.12    |
| 12                | 11            | 1205   | 0.88               | <b>2.87</b>    | 0.98    |
| 12                | 13            | 0928   | 0.90               | <b>2.84</b>    | 0.84    |
| 16                | 05            | 1207   | 0.49               | <b>0.00</b>    | 2.18    |
| 16                | 07            | 1614   | 0.65               | <b>1.40</b>    | 1.64    |
| 16                | 09            | 1290   | 0.79               | <b>2.55</b>    | 1.40    |
| 16                | 11            | 0801   | 0.85               | <b>2.78</b>    | 1.05    |
| 16                | 13            | 0400   | 0.83               | <b>2.68</b>    | 1.21    |

Supplementary Table 3: Radial Task - Monkey J

| <i>Parameters</i> |               |        | <i>Performance</i> |                |         |
|-------------------|---------------|--------|--------------------|----------------|---------|
| Targets           | Distance (cm) | Trials | Success rate       | <b>Bitrate</b> | Std dev |
| 02                | 05            | 0268   | 0.98               | <b>1.18</b>    | 0.19    |
| 02                | 07            | 0257   | 0.99               | <b>1.08</b>    | 0.14    |
| 02                | 09            | 0220   | 0.97               | <b>0.86</b>    | 0.23    |
| 02                | 11            | 0305   | 0.99               | <b>0.87</b>    | 0.09    |
| 04                | 05            | 0504   | 0.98               | <b>2.39</b>    | 0.31    |
| 04                | 07            | 0507   | 0.99               | <b>2.24</b>    | 0.26    |
| 04                | 09            | 0554   | 1.00               | <b>1.97</b>    | 0.18    |
| 04                | 11            | 0506   | 0.96               | <b>1.45</b>    | 0.36    |
| 08                | 05            | 1006   | 0.81               | <b>2.23</b>    | 1.32    |
| 08                | 07            | 1229   | 0.95               | <b>2.96*</b>   | 0.56    |
| 08                | 09            | 1048   | 0.93               | <b>2.46</b>    | 0.73    |
| 08                | 11            | 1010   | 0.94               | <b>2.17</b>    | 0.56    |
| 12                | 05            | 1321   | 0.61               | <b>0.93</b>    | 1.99    |
| 12                | 07            | 1221   | 0.79               | <b>2.09</b>    | 1.29    |
| 12                | 09            | 1202   | 0.90               | <b>2.64</b>    | 0.74    |
| 12                | 11            | 1507   | 0.88               | <b>2.11</b>    | 0.81    |
| 16                | 05            | 0402   | 0.50               | <b>0.05</b>    | 1.92    |
| 16                | 07            | 0802   | 0.65               | <b>1.22</b>    | 1.57    |
| 16                | 09            | 0402   | 0.73               | <b>1.59</b>    | 1.34    |
| 16                | 11            | 0413   | 0.77               | <b>1.66</b>    | 1.09    |

Supplementary Table 4: Radial Task - Monkey L

| <i>Parameters</i> |                |        | <i>Performance</i> |                |         |
|-------------------|----------------|--------|--------------------|----------------|---------|
| Targets           | Hold time (ms) | Trials | Success rate       | <b>Bitrate</b> | Std dev |
| 09                | 0650           | 0181   | 0.94               | <b>2.07</b>    | 0.55    |
| 25                | 0250           | 0055   | 0.29               | <b>0.00</b>    | 2.33    |
| 25                | 0450           | 0514   | 0.82               | <b>2.24</b>    | 1.10    |
| 25                | 0650           | 0507   | 0.93               | <b>2.38</b>    | 0.72    |
| 25                | 0850           | 0499   | 0.91               | <b>1.91</b>    | 0.62    |
| 25                | 1050           | 0525   | 0.98               | <b>2.15</b>    | 0.27    |
| 25                | 1250           | 0502   | 0.82               | <b>1.31</b>    | 0.56    |
| 49                | 0650           | 0941   | 0.96               | <b>2.66*</b>   | 0.59    |
| 64                | 0650           | 0849   | 0.93               | <b>2.53</b>    | 0.76    |

Supplementary Table 5: Grid Task - Monkey J: both arms restrained

| <i>Parameters</i> |                |        | <i>Performance</i> |                |         |
|-------------------|----------------|--------|--------------------|----------------|---------|
| Targets           | Hold time (ms) | Trials | Success rate       | <b>Bitrate</b> | Std dev |
| 09                | 0650           | 0281   | 0.70               | <b>0.93</b>    | 0.86    |
| 25                | 0250           | 0063   | 0.10               | <b>0.00</b>    | 1.51    |
| 25                | 0450           | 0559   | 0.59               | <b>0.68</b>    | 1.36    |
| 25                | 0650           | 0788   | 0.84               | <b>1.79</b>    | 0.88    |
| 25                | 0850           | 0786   | 0.94               | <b>1.90*</b>   | 0.52    |
| 25                | 1050           | 0885   | 0.95               | <b>1.74</b>    | 0.44    |
| 25                | 1250           | 0793   | 0.92               | <b>1.44</b>    | 0.42    |
| 49                | 0650           | 1442   | 0.85               | <b>1.86</b>    | 1.05    |
| 64                | 0650           | 1140   | 0.80               | <b>1.55</b>    | 0.88    |

Supplementary Table 6: Grid Task - Monkey L: both arms restrained

| <i>Parameters</i> |               |        | <i>Performance</i> |                |         |
|-------------------|---------------|--------|--------------------|----------------|---------|
| Targets           | Distance (cm) | Trials | Success rate       | <b>Bitrate</b> | Std dev |
| 02                | 07            | 0106   | 1.00               | <b>1.07</b>    | 0.07    |
| 04                | 07            | 0204   | 0.95               | <b>1.80</b>    | 0.44    |
| 08                | 03            | 0246   | 0.53               | <b>0.30</b>    | 2.11    |
| 08                | 05            | 0411   | 0.83               | <b>2.15*</b>   | 1.28    |
| 08                | 07            | 0468   | 0.90               | <b>2.11</b>    | 0.89    |
| 08                | 09            | 0402   | 0.85               | <b>1.48</b>    | 1.03    |
| 08                | 11            | 0406   | 0.84               | <b>1.40</b>    | 0.99    |
| 12                | 07            | 0590   | 0.76               | <b>1.65</b>    | 1.47    |
| 16                | 07            | 0810   | 0.72               | <b>2.02</b>    | 1.67    |

Supplementary Table 7: Radial Task - Monkey J: both arms restrained

| <i>Parameters</i> |               |        | <i>Performance</i> |                |         |
|-------------------|---------------|--------|--------------------|----------------|---------|
| Targets           | Distance (cm) | Trials | Success rate       | <b>Bitrate</b> | Std dev |
| 02                | 07            | 0136   | 0.98               | <b>0.75</b>    | 0.09    |
| 04                | 07            | 0202   | 1.00               | <b>1.52</b>    | 0.16    |
| 08                | 03            | 0405   | 0.68               | <b>1.06</b>    | 0.94    |
| 08                | 05            | 0405   | 0.89               | <b>1.97</b>    | 0.62    |
| 08                | 07            | 0385   | 0.96               | <b>1.91</b>    | 0.38    |
| 08                | 09            | 0400   | 0.97               | <b>1.66</b>    | 0.27    |
| 08                | 11            | 0403   | 0.88               | <b>1.48</b>    | 0.38    |
| 12                | 07            | 0606   | 0.91               | <b>2.16*</b>   | 0.54    |
| 16                | 07            | 0806   | 0.71               | <b>1.03</b>    | 1.04    |

Supplementary Table 8: Radial Task - Monkey L: both arms restrained

## Supplementary Movies

All movies are reconstructions of the neural prosthetic task from collected data during the respective closed-loop experiment. The movies playback in real time, approximated to the nearest frame (30 frames per second). For each movie, the blocks of 200 contiguous trials were selected at random among the blocks available for the optimization point.

### Movie 1

Grid task of Monkey J on 2010-09-15 at optimal parameters of 25 targets and 450 ms hold time. In this segment, the monkey sustained a bitrate of 3.5 bps.

### Movie 2

Grid task of Monkey L on 2010-09-16 at optimal parameters of 25 targets and 450 ms hold time. In this segment, the monkey sustained a bitrate of 2.5 bps.

### Movie 3

Radial task of Monkey J on 2010-09-03 at optimal parameters of 8 targets and 9 cm distance. In this segment, the monkey sustained a bitrate of 3.0 bps.

### Movie 4

Radial task of Monkey L on 2010-09-01 at optimal parameters of 8 targets and 7 cm distance. In this segment, the monkey sustained a bitrate of 3.1 bps.
